# Supplementary material
Source: Springer Nature journal article supplement (https://www.springermedizin.de/resource/supplementary/12877_2014_1025_MOESM1_ESM.pdf/9440934)
Supplement: MOESM1 [file 9440934]

Elderly residents of 22 nursing homes  
n=901

Not included (n=225)

Away when study took place n=6

Terminally ill n=15

Urine sample impossible to obtain due to  
substantial incontinence n=40

Urine sample impossible to obtain due to  
severe dementia n=55

Urine sample impossible to obtain due to  
severe incontinence/dementia n=14

Indwelling urinary catheter n=59

Suprapubic catheter n=2

Clean intermittent catheterisation n=3

Urostomy n=1

For unknown reason not asked to  
participate n=30

Eligible patients fulfilling inclusion criteria n=676

Excluded patients (n=251)

Refused participation n=222

One ward withdrew during  
ongoing study n=27

Lack of time (attending nurse) n=2

Conclusive urine cultures (n=421)

Inconclusive results (n=4)

Urine for culture accidentally lost n=4
